# Supplementary material
Source: publisher figshare collection journal article supplement (https://gsapubs.figshare.com/ndownloader/files/28496565)
Supplement: Supplementary file 1 [file 28496565]

## Sheet: Sheet2
SN17-02B				SN17-04A				SN17-06A				SN17-09A
depth in 2007 turbidite (cm)	D10 (µm)	mean (µm)	sorting (µm)	depth in 2007 turbidite (cm)	D10 (µm)	mean (µm)	sorting (µm)	depth in 2007 turbidite (cm)	D10 (µm)	mean (µm)	sorting (µm)	depth in 2007 turbidite (cm)	D10 (µm)	mean (µm)	sorting (µm)
0.25	2.69615	11.11	2.99754	0.25	1.03498	4.83	5.55471	0.25	2.9333	16.88	5.119	0.25	2.44067	11.62	5.05787
0.75	2.72373	14.61	3.37212	0.75	1.74031	4.37	2.41487	0.75	2.92939	8.42	2.361	0.75	2.30235	6.22	2.27226
1.25	3.47708	19.54	3.39129	1.25	2.39414	5.97	2.08977	1.25	2.7223	6.24	1.9	1.25	2.94059	7.75	2.09779
1.75	1.72919	4.24	2.30657	1.75	2.98224	9.15	2.45521	1.75	2.99899	9.33	3.045	1.75	3.14307	8.84	2.23012
2.25	2.41257	7.69	2.98633	2.25	3.23466	10.5	2.45564	2.25	3.40491	10.66	2.512	2.25	3.42259	10.52	2.37129
2.75	3.04093	8.77	2.3186	2.75	3.2697	10.89	2.49054	2.75	3.24449	9.88	2.35	2.75	3.51439	11.44	2.51117
3.25	3.03474	9.09	2.43054	3.25	3.43204	11.13	2.39247	3.25	3.57278	10.93	2.336	3.25	3.59174	11.2	2.35277
3.75	3.28472	11.26	2.58132	3.75	3.39615	11.52	2.45712	3.75	3.28258	10.74	2.449	4.25	3.50142	11.83	2.53761
4.25	3.5152	13.43	2.92147	4.25	3.41347	12.51	2.58283	4.25	3.35916	11.42	2.596	4.75	3.61411	11.9	2.46886
4.75	3.59524	13.05	2.70881	4.75	3.63338	14.42	2.7162	4.75	3.26161	11.34	2.59	5.25	3.53553	11.33	2.39933
5.25	3.39512	12.41	2.63277	5.25	3.83316	16.27	2.83647	5.25	3.68111	14.82	3.207	5.75	3.87032	13.68	2.56027
5.75	3.37147	11.43	2.49325	5.75	3.80214	16.43	2.86102	5.75	3.222	11.3	2.566	6.25	4.19382	16.86	2.70596
6.25	3.54642	13.22	2.74633	6.25	3.82307	17.19	2.95957	6.25	3.37731	11.27	2.462	6.75	4.44937	19.72	2.97797
6.75	3.72492	14.29	2.77318	6.75	3.85658	18.39	3.03764	6.75	3.20943	11.09	2.585	7.25	4.02722	20.09	3.21005
7.25	4.14615	16.12	2.75721	7.25	3.75797	18.05	3.08495	7.25	3.53725	14.22	2.806	7.75	4.05687	19.87	3.16401
7.75	4.08791	17.42	2.87887	7.75	3.72062	18.25	3.13922	7.75	3.67946	13.88	2.756	8.25	3.97037	19.66	3.24266
8.25	4.51183	20.77	3.03578	8.25	3.72871	18.59	3.20868	8.25	3.4958	14.03	2.916	8.75	4.10874	20.32	3.27306
8.75	5.19559	25.1	3.02047	8.75	4.09357	20.63	3.29545	8.75	3.59217	15.12	3.079	9.25	3.97756	21.14	3.5445
9.25	5.58744	28.43	3.03594	9.25	4.11055	21.72	3.30037	9.25	3.47364	14.63	3.099	9.75	4.03151	20.37	3.24061
9.75	5.48501	28.38	3.17814	9.75	4.16543	20.73	3.15317	9.75	3.58517	14.33	2.866	10.25	3.6512	16.67	3.27541
10.25	4.79379	22.37	3.09465	10.25	4.05734	22.03	3.39455	10.25	3.64045	15.22	2.892	10.75	3.48466	16.72	3.25997
10.75	4.88497	22.79	3.08075	10.75	4.70293	27.31	3.43059	10.75	3.7231	16.46	3.005	11.25	3.87223	19.39	3.19757
11.25	4.9475	24.59	3.31695	11.25	6.57748	37.91	3.25691	11.25	3.39532	13.39	2.788	11.75	4.20911	21.04	3.27701
11.75	4.70479	20.4	2.88786	11.75	7.36959	41.69	3.14911	11.75	3.66111	15.32	2.89	12.25	4.31162	21.71	3.30014
12.25	5.36567	27.42	3.24751	12.25	9.50688	63.85	3.28964	12.25	3.51148	14.93	2.937	12.75	4.18518	24.03	3.63787
12.75	5.20959	25.88	3.15118	12.75	6.06956	54.21	3.9967	12.75	3.74774	17.46	3.109	13.25	4.26935	21.82	3.25025
13.25	5.45046	27.29	3.16708	13.25	5.62923	57.61	4.862	13.25	3.65997	18.58	3.32	13.75	4.94807	35.4	4.81929
13.75	5.73572	35.94	3.55564	13.75	8.39447	72.27	3.84209	13.75	3.72637	17.78	3.163	14.25	4.85854	27.33	3.70761
14.25	4.90182	28.21	3.49026	14.25	25.8769	114.8	3.04499	14.25	3.52736	18.32	3.585	14.75	4.5841	22.61	3.14594
14.75	5.19256	31.32	3.54754	14.75	27.4654	142.43	3.27506	14.75	3.65527	18.46	3.242	15.25	4.62544	22.71	3.18098
15.25	5.66098	36.14	3.69352	15.25	29.6733	149.86	3.21312	15.25	3.61429	22.33	3.602	15.75	4.32551	21.31	3.23667
15.75	5.81546	37.1	3.54775	15.75	40.1761	126.86	2.66822	15.75	3.62025	21.47	3.674	16.25	4.77233	27.93	3.88275
16.25	8.0669	56.24	3.54173	16.25	41.3691	156.4	2.87189	16.25	4.61205	24.34	3.223	16.75	4.85582	25.39	3.28816
16.75	5.65396	40.03	3.83037	16.75	57.0677	192.04	2.88736	16.75	3.90653	30.18	4.595	17.25	4.5967	22.69	3.15998
17.25	8.46594	60.78	3.55597	17.25	52.8559	182.05	2.86245	17.25	33.8774	215.29	3.504	17.75	5.48908	32.26	3.75188
17.75	18.7785	96.15	3.02352	17.75	26.0246	167.13	3.29556	17.75	5.71749	105.08	6.215	18.25	5.12306	24.13	3.04335
18.25	15.6313	93.77	3.17065	18.25	25.5109	193.77	3.64869					18.75	5.20474	24.79	3.09567
18.75	10.2449	90.68	3.81541	18.75	9.56786	114.55	5.10826					19.1	16.2941	61.08	2.59136
19.25	10.0953	113.09	4.21667	19.25	4.24145	22.33	3.36664					19.3	17.4956	63.94	2.57414
19.75	6.5453	77.57	5.02897	19.75	4.42907	22.65	3.29188					19.5	11.8604	52.45	2.82833
20.25	15.604	149.89	3.72552	20.25	4.50451	27.28	3.89298					19.7	7.8567	38.16	2.94846
20.75	3.99939	37.1	6.05707	20.75	4.65533	27.71	3.71644					19.9	10.2781	51.08	2.97193
				21.25	6.48919	53	4.23519					20.1	15.6574	72.15	2.91879
				21.75	7.85951	64.46	3.7037					20.3	13.751	80.49	3.18213
				22.25	14.6794	93.84	3.26817					20.5	16.8937	96.15	3.09006
				22.75	9.30793	90.18	3.96294					20.9	14.0441	91.58	3.4089
												21.1	6.61897	47.82	4.0442
												21.3	5.56297	36.03	3.95859
												21.5	4.77892	22.32	2.97535
												21.7	4.36984	21.8	3.13069
												21.9	4.47665	22.03	3.18447
												22.25	4.3825	21.05	3.04528
												22.75	4.1983	20.57	3.15874
												23.25	4.31777	20.33	3.25695
												23.75	4.46076	21.82	3.16314
												24.25	4.54296	22.92	3.27441
												24.75	5.79945	41.59	4.07353
												25.1	19.8529	51.45	2.22574
												25.3	18.8353	61.69	2.4215
												25.5	19.6182	70.01	2.49993
												25.7	14.9301	76.84	2.94407
												25.9	15.2419	69.89	2.82749
												26.1	21.4861	74.21	2.5168
												26.3	16.9747	80.27	2.82764
												26.5	19.6536	83.04	2.72074
												26.7	13.6418	68.5	2.92771
												26.9	5.46384	30.39	3.34822
												27.25	3.93885	13.08	2.52851
												27.75	2.44899	7.66	2.48869

## Sheet: G48940
Wils, K., et al., 2021, Earthquake doublet revealed by multiple pulses in lacustrine seismo-turbidites: Geology, v. 49, https://doi.org/10.1130/G48940.1
